# Supplementary material for: Efficacy and Safety of Edoxaban in Elderly Patients With Atrial Fibrillation in the ENGAGE AF–TIMI 48 Trial
Source: PubMed Central journal article supplement — J Am Heart Assoc. 2016 May 20;5(5):e003432. doi: 10.1161/JAHA.116.003432 (PMC4889207; doi:10.1161/jaha.116.003432), 2016-05-20
Supplement: JAH3-5-e003432-s001.pdf [file JAH3-5-e003432-s001.pdf]

# SUPPLEMENTAL MATERIAL

| Tables and Figures           | Title                                                                                      | Page |
|------------------------------|--------------------------------------------------------------------------------------------|------|
| <b>Supplementary Tables</b>  |                                                                                            |      |
| Supplementary Table S1       | Edoxaban Concentration and FXa Activity at Trough by Age and Dose Reduction                | 2    |
| Supplementary Table S2       | Primary Outcomes by Dose Reduction<br>( <i>Higher dose edoxaban regimen</i> )              | 3    |
| Supplementary Table S3       | Primary Outcomes by Dose Reduction<br>( <i>Lower dose edoxaban regimen</i> )               | 4    |
| Supplementary Table S4       | Baseline Characteristics of Very Elderly Population<br>( $\geq 80$ years)                  | 5    |
| Supplementary Table S5       | Baseline Characteristics of Very Elderly Population<br>( $\geq 85$ years)                  | 6    |
| Supplementary Table S6       | Outcomes in Very Elderly Population ( $\geq 80$ years)                                     | 7    |
| Supplementary Table S7       | Outcomes in Very Elderly Population ( $\geq 85$ years)                                     | 8    |
| Supplementary Table S8       | Outcomes by Patients Aged $<75$ and $\geq 75$ years                                        | 9    |
| <b>Supplementary Figures</b> |                                                                                            |      |
| Supplementary Figure S1      | Age Distribution                                                                           | 10   |
| Supplementary Figure S2      | Efficacy and Safety Outcomes Comparing the Lower Dose Edoxaban Regimen vs. Warfarin by Age | 11   |
| Supplementary Figure S3      | Net Clinical Outcomes of the Lower Dose Edoxaban Regimen Compared to Warfarin              | 12   |

**Supplementary Table S1. Edoxaban Trough Concentration and Anti-FXa Activity at Trough by Age and Dose Reduction**

|                                                 |                   | <65 year        | 65-74 year      | ≥75 year        |
|-------------------------------------------------|-------------------|-----------------|-----------------|-----------------|
| <b>Edoxaban Concentration at trough (ng/mL)</b> | HDER No DR (60mg) | 29.4[15.3-53.1] | 36.1[20.0-63.8] | 42.6[25.4-68.4] |
|                                                 | HDER DR (30mg)    | 18.2[10.0-38.8] | 25.1[13.0-41.4] | 28.8[16.5-45.8] |
|                                                 | LDER No DR (30mg) | 14.0[7.3-27.3]  | 18.5[10.6-31.7] | 22.8[13.4-36.0] |
|                                                 | LDER DR (15mg)    | 8.2[3.6-14.3]   | 11.6[6.6-19.6]  | 13.5[8.4-22.2]  |
| <b>Anti FXa Activity at trough (IU/mL)</b>      | HDER No DR (60mg) | 0.5[0.3-1.0]    | 0.7[0.4-1.1]    | 0.8[0.5-1.3]    |
|                                                 | HDER DR (30mg)    | 0.5[0.2-1.0]    | 0.5[0.3-0.9]    | 0.5[0.3-0.8]    |
|                                                 | LDER No DR (30mg) | 0.3[0.2-0.5]    | 0.4[0.2-0.5]    | 0.4[0.3-0.7]    |
|                                                 | LDER DR (15mg)    | 0.2[0.2-0.3]    | 0.3[0.2-0.5]    | 0.3[0.2-0.5]    |

DR; dose reduction, HDER; higher dose edoxaban regimen, LDER; lower dose edoxaban regimen.

**Supplementary Table S2. Primary Outcomes by Dose Reduction (Higher dose edoxaban regimen (60/30 mg))**

|                |             | Event Rates (%/pt-yrs)                         |          |                                       |          | Higher dose edoxaban regimen vs. warfarin      |                                       |                    |                    |
|----------------|-------------|------------------------------------------------|----------|---------------------------------------|----------|------------------------------------------------|---------------------------------------|--------------------|--------------------|
| Outcomes       | Age         | Did not meet edoxaban dose reduction criteria* |          | Met edoxaban dose reduction criteria* |          | Did not meet edoxaban dose reduction criteria* | Met edoxaban dose reduction criteria* | P <sub>int</sub> † | 3 way              |
|                |             | Edox 60mg                                      | Warfarin | Edox 30mg                             | Warfarin | HR [95% CI]                                    | HR [95% CI]                           |                    | P <sub>int</sub> ‡ |
| Stroke or SEE  | <65 years   | 1.1                                            | 1.1      | 1.0                                   | 1.7      | 0.99 [0.67-1.47]                               | 0.62 [0.20-1.90]                      | 0.43               | 0.52               |
|                | 65-74 years | 1.4                                            | 1.6      | 2.6                                   | 2.5      | 0.85 [0.62-1.16]                               | 1.01 [0.59-1.70]                      | 0.60               |                    |
|                | ≥75 years   | 1.6                                            | 1.9      | 2.4                                   | 2.9      | 0.82 [0.60-1.12]                               | 0.84 [0.61-1.15]                      | 0.91               |                    |
| Major Bleeding | <65 years   | 1.4                                            | 1.8      | 1.9                                   | 1.9      | 0.79 [0.56-1.11]                               | 1.04 [0.39-2.76]                      | 0.62               | 0.09               |
|                | 65-74 years | 2.4                                            | 3.3      | 2.7                                   | 3.5      | 0.75 [0.58-0.96]                               | 0.76 [0.45-1.30]                      | 0.95               |                    |
|                | ≥75 years   | 4.4                                            | 4.1      | 3.4                                   | 6.0      | 1.06 [0.84-1.33]                               | 0.58 [0.43-0.77]                      | 0.0013             |                    |

\*In the higher-dose edoxaban regimen, patients with moderate renal dysfunction, weight ≤ 60 mg, or use of strong P-gp inhibitors received 30 mg instead of 60 mg edoxaban once daily. There was no “dose reduction” for warfarin; instead the dose of warfarin was titrated to a target INR of 2.0-3.0.

†p-interaction for dose reduction and treatment effect

‡3 way p-interaction for dose reduction, treatment effect and age

**Supplementary Table S3. Primary Outcomes by Dose Reduction (Lower dose edoxaban regimen 30/15 mg)**

|                |             | Event Rates (%/pt-yrs)                         |          |                                       |          | Lower dose edoxaban regimen vs. warfarin       |                                       |                    |                     |
|----------------|-------------|------------------------------------------------|----------|---------------------------------------|----------|------------------------------------------------|---------------------------------------|--------------------|---------------------|
| Outcomes       | Age         | Did not meet edoxaban dose reduction criteria* |          | Met edoxaban dose reduction criteria* |          | Did not meet edoxaban dose reduction criteria* | Met edoxaban dose reduction criteria* | P <sub>int</sub> * | 3 way               |
|                |             | Edox 30mg                                      | Warfarin | Edox 15 mg                            | Warfarin | HR [95% CI]                                    | HR [95% CI]                           |                    | P <sub>int</sub> ** |
| Stroke or SEE  | <65 years   | 1.5                                            | 1.1      | 2.3                                   | 1.7      | 1.43 [0.99-2.08]                               | 1.34 [0.55-3.29]                      | 0.89               | 0.82                |
|                | 65-74 years | 1.6                                            | 1.6      | 3.0                                   | 2.5      | 0.94 [0.70-1.28]                               | 1.16 [0.70-1.93]                      | 0.49               |                     |
|                | ≥75 years   | 2.0                                            | 1.9      | 3.3                                   | 2.9      | 1.07 [0.80-1.45]                               | 1.15 [0.86-1.54]                      | 0.74               |                     |
| Major Bleeding | <65 years   | 0.8                                            | 1.8      | 0.5                                   | 1.9      | 0.43 [0.28-0.65]                               | 0.24 [0.05-1.13]                      | 0.48               | 0.05                |
|                | 65-74 years | 1.6                                            | 3.3      | 1.8                                   | 3.5      | 0.48 [0.36-0.63]                               | 0.51 [0.29-0.93]                      | 0.82               |                     |
|                | ≥75 years   | 2.7                                            | 4.1      | 1.6                                   | 6.0      | 0.65 [0.51-0.84]                               | 0.27 [0.18-0.39]                      | 0.000 <sub>1</sub> |                     |

\*In the lower-dose edoxaban regimen, patients with moderate renal dysfunction, weight ≤ 60 kg, or use of strong P-gp inhibitors received 15 mg instead of 30 mg edoxaban once daily. There was no “dose reduction” for warfarin; instead the dose of warfarin was titrated to a target INR of 2.0-3.0.

†p-interaction for dose reduction and treatment effect

‡3 way p-interaction for dose reduction, treatment effect and age

**Supplementary Table S4 Patient Characteristics in Very Elderly Population (≥ 80 years)**

| <b>Characteristics</b>                       | <b>&lt; 80 years<br/>(N=17514, 83.0%)</b> | <b>≥ 80 years<br/>(N=3591, 17.1%)</b> |
|----------------------------------------------|-------------------------------------------|---------------------------------------|
| Age -- years                                 | 70 [63.0-75.0]                            | 82 [81.0-85.0]                        |
| Weight -- kg                                 | 83.8 [71.5-97.1]                          | 74 [64.1-84.0]                        |
| Female Sex                                   | 6386 (37)                                 | 1654 (46)                             |
| Hypertension                                 | 16433 (94)                                | 3321 (93)                             |
| Dyslipidemia                                 | 9215 (53)                                 | 1843 (51)                             |
| Diabetes                                     | 6717 (38)                                 | 907 (25)                              |
| Current Smoking                              | 1443 (8.2)                                | 109 (3.0)                             |
| Prior PCI                                    | 1162 (6.6)                                | 278 (7.7)                             |
| Prior Stroke or TIA                          | 5017 (29)                                 | 956 (27)                              |
| Congestive Heart Failure                     | 10501 (60)                                | 1623 (45)                             |
| Type of AF                                   |                                           |                                       |
| <i>Paroxysmal</i>                            | 4452 (25)                                 | 914 (26)                              |
| <i>Permanent</i>                             | 9018 (52)                                 | 1847 (52)                             |
| CrCl (ml/min) at randomization               | 75.6 [59.1-96.8]                          | 49.8 [41.0-60.8]                      |
| ≤50                                          | 2256 (13)                                 | 1818 (51)                             |
| >50-80                                       | 7593 (43)                                 | 1572 (44)                             |
| > 80                                         | 7665 (44)                                 | 201 (5.6)                             |
| Race                                         |                                           |                                       |
| <i>White</i>                                 | 14007 ( 80)                               | 3060 (85)                             |
| <i>Asian</i>                                 | 2588 (15)                                 | 321 (8.9)                             |
| <i>Black</i>                                 | 250 (1.4)                                 | 28 (0.8)                              |
| <i>Other</i>                                 | 669 (3.8)                                 | 181 (5.0)                             |
| CHADS <sub>2</sub> Score                     |                                           |                                       |
| <i>Mean (SD)</i>                             | 2.8 (0.9)                                 | 3.2 (1.1)                             |
| 4-6                                          | 3593 (21)                                 | 1175 (33)                             |
| CHA <sub>2</sub> DS <sub>2</sub> -VASc Score |                                           |                                       |
| <i>Mean (SD)</i>                             | 4.2 (1.4)                                 | 5.0 (1.3)                             |
| 4-6                                          | 11718 (67)                                | 3201 (89)                             |
| HAS-BLED Score ≥3                            | 7751 (44)                                 | 2051 (57)                             |
| Time in Therapeutic range                    | 68.2 [56.3-77.2]                          | 69.5 [57.8-78.5]                      |
| Dose reduction at randomization              | 3465 (20)                                 | 1891 (53)                             |
| Prior VKA experience                         | 10274 (59)                                | 2167 (60)                             |
| Medication at randomization                  |                                           |                                       |
| <i>Aspirin</i>                               | 5110 (29)                                 | 1070 (30)                             |
| <i>Thienopyridine</i>                        | 393 (2.2)                                 | 94 (2.6)                              |

\*See Figure 1 Legend for abbreviations and for data presentation.

p value <0.001 for all comparisons except for hypertension (p=0.003), dyslipidemia (p=0.158), prior PCI (p=0.016), prior stroke or TIA (p=0.014), Type of AF (p=0.996), Time in therapeutic range (p=0.225), prior VKA experience (p=0.062), aspirin use (p=0.455), and thienopyridine use (p=0.174).

**Supplementary Table S5 Patient Characteristics in Very Elderly Population (≥85 years)**

| <b>Characteristics</b>                       | <b>&lt; 85 years<br/>(N=20206, 95.7%)</b> | <b>≥ 85 years<br/>(N=899, 4.3%)</b> |
|----------------------------------------------|-------------------------------------------|-------------------------------------|
| Age -- years                                 | 71 [64.0-77.0]                            | 86 [85.0-88.0]                      |
| Weight -- kg                                 | 82 [70.0-95.7]                            | 72 [63.0-81.2]                      |
| Female Sex                                   | 7634 (38)                                 | 406 (45)                            |
| Hypertension                                 | 18927 (94)                                | 827 (92)                            |
| Dyslipidemia                                 | 10607 (53)                                | 451 (50)                            |
| Diabetes                                     | 7438 (37)                                 | 186 (21)                            |
| Current Smoking                              | 1533 (7.6)                                | 19 (2.1)                            |
| Prior PCI                                    | 1379 (6.8)                                | 61 (6.8)                            |
| Prior Stroke or TIA                          | 5716 (28.3)                               | 257 (29)                            |
| Congestive Heart Failure                     | 11700 (58)                                | 424 (47)                            |
| Type of AF                                   |                                           |                                     |
| <i>Paroxysmal</i>                            | 5146 (26)                                 | 220 (25)                            |
| <i>Permanent</i>                             | 10405 (52)                                | 460 (51)                            |
| CrCl (ml/min) at randomization               | 71.7 [55.3-93.1]                          | 44.3 [37.0-53.3]                    |
| ≤50                                          | 3473 (17)                                 | 601 (67)                            |
| >50-80                                       | 8881 (44)                                 | 284 (32)                            |
| > 80                                         | 7852 (39)                                 | 14 (1.6)                            |
| Race                                         |                                           |                                     |
| <i>White</i>                                 | 16291 (81)                                | 776 (86)                            |
| <i>Asian</i>                                 | 2844 (14)                                 | 65 (7.2)                            |
| <i>Black</i>                                 | 271 (1.3)                                 | 7 (0.8)                             |
| <i>All others</i>                            | 799 (4.0)                                 | 51 (5.7)                            |
| CHADS <sub>2</sub> Score                     |                                           |                                     |
| <i>Mean (Sd)</i>                             | 2.8 (1.0)                                 | 3.2 (1.1)                           |
| 4-6                                          | 4467 (22)                                 | 301 (34)                            |
| CHA <sub>2</sub> DS <sub>2</sub> -VASc Score |                                           |                                     |
| <i>Mean (Sd)</i>                             | 4.3 (1.4)                                 | 5.0 (1.3)                           |
| 4-6                                          | 14129 (70)                                | 790 (88)                            |
| HAS-BLED Score ≥3                            | 9279 (46)                                 | 523 (58)                            |
| Time in Therapeutic range                    | 68.4 [56.5-77.4]                          | 68.4 [57.9-77.4]                    |
| Dose reduction at randomization              | 4754 (24)                                 | 602 (67)                            |
| Prior VKA experience                         | 11912 (59)                                | 529 (59)                            |
| Medication at randomization                  |                                           |                                     |
| <i>Aspirin</i>                               | 5912 (29)                                 | 268 (30)                            |
| <i>Thienopyridine</i>                        | 461 (2.3)                                 | 26 (2.9%)                           |

p value <0.001 for all comparisons except for hypertension (p=0.044), dyslipidemia (p=0.172), prior PCI (p=0.962), prior stroke or TIA (p=0.864), Type of AF (p=0.630), time in therapeutic range (p=0.238), prior VKA experience (p=0.946), aspirin use (p=0.725), and thienopyridine use (p=0.233)..

**Supplementary Table S6 Outcomes in Very Elderly Population (≥ 80 years)**

|                       |                  | Warfarin          | HDER              | LDER              | HDER vs. War       |                    | LDER vs. War       |                    |
|-----------------------|------------------|-------------------|-------------------|-------------------|--------------------|--------------------|--------------------|--------------------|
|                       |                  | Event rate (%/yr) | Event rate (%/yr) | Event rate (%/yr) | HR (95% CI)        | Pint               | HR (95% CI)        | Pint               |
| Stroke/SEE            | < 80 yr          | 1.6               | 1.4               | 1.9               | 0.87 (0.73 - 1.04) | 0.97               | 1.17 (0.99 - 1.39) | 0.39               |
|                       | ≥ 80 yr          | 2.9               | 2.5               | 2.8               | 0.88 (0.64 - 1.20) |                    | 1.01 (0.75 - 1.36) |                    |
| Ischemic Stroke       | < 80 yr          | 1.1               | 1.1               | 1.7               | 1.03 (0.84 - 1.27) | 0.54               | 1.49 (1.23 - 1.81) | 0.23               |
|                       | ≥ 80 yr          | 2.1               | 1.8               | 2.4               | 0.90 (0.63 - 1.30) |                    | 1.18 (0.84 - 1.65) |                    |
| Hemorrhagic Stroke    | < 80 yr          | 0.4               | 0.2               | 0.2               | 0.55 (0.37 - 0.82) | 0.93               | 0.37 (0.23 - 0.59) | 0.31               |
|                       | ≥ 80 yr          | 0.8               | 0.4               | 0.2               | 0.53 (0.26 - 1.06) |                    | 0.21 (0.08 - 0.56) |                    |
| Fatal Stroke          | < 80 yr          | 0.4               | 0.4               | 0.3               | 0.96 (0.67 - 1.37) | 0.75               | 0.84 (0.58 - 1.22) | 1.00               |
|                       | ≥ 80 yr          | 0.8               | 0.7               | 0.7               | 0.86 (0.48 - 1.53) |                    | 0.84 (0.47 - 1.50) |                    |
| Major bleeding        | < 80 yr          | 3.0               | 2.5               | 1.5               | 0.83 (0.71 - 0.96) | 0.54               | 0.49 (0.41 - 0.58) | 0.37               |
|                       | ≥ 80 yr          | 6.2               | 4.6               | 2.6               | 0.75 (0.58 - 0.98) |                    | 0.42 (0.31 - 0.56) |                    |
| ICH                   | < 80 yr          | 0.7               | 0.4               | 0.2               | 0.49 (0.34 - 0.69) | 0.64               | 0.31 (0.20 - 0.47) | 0.88               |
|                       | ≥ 80 yr          | 1.6               | 0.6               | 0.5               | 0.41 (0.22 - 0.77) |                    | 0.29 (0.15 - 0.57) |                    |
| Fatal bleeding        | < 80 yr          | 0.3               | 0.2               | 0.1               | 0.57 (0.35 - 0.94) | 0.79               | 0.28 (0.15 - 0.54) | 0.27               |
|                       | ≥ 80 yr          | 0.8               | 0.4               | 0.4               | 0.50 (0.21 - 1.15) |                    | 0.50 (0.22 - 1.13) |                    |
| Major GI bleeding     | < 80 yr          | 1.1               | 1.3               | 0.7               | 1.19 (0.95 - 1.5)  | 0.41               | 0.66 (0.51 - 0.85) | 0.87               |
|                       | ≥ 80 yr          | 1.9               | 2.7               | 1.3               | 1.44 (0.97 - 2.13) |                    | 0.69 (0.43 - 1.09) |                    |
| Net clinical outcome: | < 80 yr          | 7.0               | 6.5               | 6.1               | 0.92 (0.85 - 1.01) | 0.17               | 0.87 (0.79 - 0.95) | 0.09               |
|                       | <i>Primary</i>   | ≥ 80 yr           | 14.2              | 11.6              | 10.5               | 0.82 (0.71 - 0.95) |                    | 0.75 (0.65 - 0.87) |
| Net clinical outcome: | < 80 yr          | 4.4               | 4.0               | 3.8               | 0.91 (0.82 - 1.02) | 0.30               | 0.86 (0.78 - 0.96) | 0.24               |
|                       | <i>Secondary</i> | ≥ 80 yr           | 9.6               | 7.8               | 7.2                | 0.82 (0.69 - 0.97) |                    | 0.76 (0.64 - 0.91) |
| Net clinical outcome: | < 80 yr          | 5.1               | 4.6               | 4.8               | 0.90 (0.81 - 0.99) | 0.43               | 0.93 (0.84 - 1.03) | 0.10               |
|                       | <i>Tertiary</i>  | ≥ 80 yr           | 10.7              | 8.8               | 8.3                | 0.83 (0.71 - 0.98) |                    | 0.79 (0.67 - 0.93) |

HDER; Higher dose edoxaban regimen, LDER; lower dose edoxaban

\*See Table 1 for abbreviations.

**Supplementary Table S7 Outcomes Very Elderly Population (≥ 85 years)**

|                      |                  | Warfarin          | HDER              | LDER              | HDER vs. warfarin  |                    | LDER vs. warfarin  |                    |
|----------------------|------------------|-------------------|-------------------|-------------------|--------------------|--------------------|--------------------|--------------------|
|                      |                  | Event rate (%/yr) | Event rate (%/yr) | Event rate (%/yr) | HR (95% CI)        | Pint               | HR (95% CI)        | Pint               |
| Stroke / SEE         | <85 year         | 1.7               | 1.5               | 2.0               | 0.88 (0.75 - 1.03) | 0.56               | 1.14 (0.98 - 1.33) | 0.68               |
|                      | ≥85 year         | 3.5               | 2.5               | 3.4               | 0.73 (0.40 - 1.33) |                    | 1.01 (0.58 - 1.76) |                    |
| Ischemic Stroke      | <85 year         | 1.2               | 1.2               | 1.7               | 1.01 (0.84 - 1.22) | 0.50               | 1.42 (1.19 - 1.69) | 0.80               |
|                      | ≥85 year         | 2.4               | 1.9               | 3.0               | 0.79 (0.39 - 1.60) |                    | 1.30 (0.69 - 2.47) |                    |
| Hemorrhagic Stroke   | <85 year         | 0.5               | 0.3               | 0.2               | 0.53 (0.37 - 0.76) | 0.78               | 0.35 (0.23 - 0.54) | N/A                |
|                      | ≥85 year         | 0.8               | 0.5               | 0.0               | 0.64 (0.18 - 2.28) |                    | N/A                |                    |
| Fatal Stroke         | <85 year         | 0.4               | 0.4               | 0.4               | 0.96 (0.70 - 1.31) | 0.40               | 0.82 (0.59 - 1.14) | 0.64               |
|                      | ≥85 year         | 1.0               | 0.5               | 1.0               | 0.56 (0.16 - 1.91) |                    | 1.07 (0.38 - 3.05) |                    |
| Major bleeding       | <85 year         | 3.3               | 2.7               | 1.6               | 0.82 (0.72 - 0.94) | 0.17               | 0.48 (0.41 - 0.56) | 0.35               |
|                      | ≥85 year         | 8.8               | 5.0               | 3.1               | 0.58 (0.35 - 0.94) |                    | 0.36 (0.20 - 0.64) |                    |
| ICH                  | <85 year         | 0.8               | 0.4               | 0.2               | 0.46 (0.33 - 0.62) | 0.62               | 0.29 (0.20 - 0.42) | 0.38               |
|                      | ≥85 year         | 1.6               | 0.9               | 0.8               | 0.61 (0.20 - 1.88) |                    | 0.51 (0.15 - 1.70) |                    |
| Fatal bleeding       | <85 year         | 0.4               | 0.2               | 0.1               | 0.52 (0.33 - 0.82) | 0.45               | 0.31 (0.18 - 0.53) | 0.17               |
|                      | ≥85 year         | 0.6               | 0.6               | 0.6               | 0.99 (0.20 - 4.91) |                    | 1.03 (0.21 - 5.12) |                    |
| Major GI bldding     | <85 year         | 1.1               | 1.5               | 0.8               | 1.29 (1.05 - 1.57) | 0.14               | 0.70 (0.56 - 0.89) | 0.15               |
|                      | ≥85 year         | 3.8               | 2.8               | 1.3               | 0.76 (0.39 - 1.50) |                    | 0.36 (0.15 - 0.87) |                    |
| Net clinical outcome | <85 year         | 7.7               | 7.0               | 6.5               | 0.90 (0.84 - 0.98) | 0.25               | 0.84 (0.78 - 0.91) | 0.41               |
|                      | <i>Primary</i>   | ≥85 year          | 19.2              | 14.6              | 14.0               | 0.77 (0.60 - 1.00) |                    | 0.75 (0.58 - 0.98) |
| Net clinical outcome | <85 year         | 4.9               | 4.4               | 4.2               | 0.89 (0.81 - 0.98) | 0.52               | 0.84 (0.76 - 0.93) | 0.73               |
|                      | <i>Secondary</i> | ≥85 year          | 13.3              | 10.5              | 10.2               | 0.81 (0.60 - 1.08) |                    | 0.80 (0.59 - 1.08) |
| Net clinical outcome | <85 year         | 5.7               | 5.0               | 5.2               | 0.89 (0.81 - 0.97) | 0.48               | 0.90 (0.82 - 0.99) | 0.41               |
|                      | <i>Tertiary</i>  | ≥85 year          | 14.6              | 11.4              | 11.2               | 0.80 (0.60 - 1.06) |                    | 0.79 (0.59 - 1.06) |



**Supplementary Table S8 Outcomes by patients aged <75 and ≥75 years**

|                                      |         | Warfarin                 | HDER                     | LDER                     | HDER vs. Warfarin  |       | LDER vs. Warfarin  |       |  |
|--------------------------------------|---------|--------------------------|--------------------------|--------------------------|--------------------|-------|--------------------|-------|--|
|                                      |         | Event rate<br>(%/pt-yrs) | Event rate<br>(%/pt-yrs) | Event rate<br>(%/pt-yrs) | HR<br>(95% CI)     | P-int | HR<br>(95% CI)     | P-int |  |
| Stroke / SEE                         | < 75 yr | 1.5                      | 1.4                      | 1.7                      | 0.91 (0.73 - 1.13) | 0.59  | 1.14 (0.93 - 1.40) | 0.87  |  |
|                                      | ≥ 75yr  | 2.3                      | 1.9                      | 2.6                      | 0.83 (0.67 - 1.04) |       | 1.12 (0.91 - 1.37) |       |  |
| Ischemic Stroke                      | < 75 yr | 1.0                      | 1.1                      | 1.5                      | 1.10 (0.86 - 1.42) | 0.26  | 1.52 (1.20 - 1.93) | 0.39  |  |
|                                      | ≥ 75yr  | 1.7                      | 1.5                      | 2.2                      | 0.90 (0.69 - 1.16) |       | 1.31 (1.03 - 1.66) |       |  |
| Hemorrhagic Stroke                   | < 75 yr | 0.4                      | 0.2                      | 0.1                      | 0.51 (0.32 - 0.82) | 0.71  | 0.31 (0.18 - 0.54) | 0.74  |  |
|                                      | ≥ 75yr  | 0.5                      | 0.3                      | 0.2                      | 0.58 (0.35 - 0.97) |       | 0.36 (0.19 - 0.66) |       |  |
| Fatal Stroke                         | < 75 yr | 0.3                      | 0.3                      | 0.3                      | 1.00 (0.64 - 1.56) | 0.64  | 0.88 (0.56 - 1.39) | 0.81  |  |
|                                      | ≥ 75yr  | 0.6                      | 0.5                      | 0.5                      | 0.86 (0.57 - 1.31) |       | 0.81 (0.53 - 1.24) |       |  |
| Major bleeding                       | < 75 yr | 2.6                      | 2.0                      | 1.2                      | 0.77 (0.64 - 0.93) | 0.57  | 0.47 (0.38 - 0.58) | 0.95  |  |
|                                      | ≥ 75yr  | 4.8                      | 4.0                      | 2.3                      | 0.83 (0.70 - 0.99) |       | 0.47 (0.38 - 0.58) |       |  |
| ICH                                  | < 75 yr | 0.6                      | 0.3                      | 0.2                      | 0.54 (0.35 - 0.82) | 0.34  | 0.30 (0.18 - 0.51) | 0.99  |  |
|                                      | ≥ 75yr  | 1.2                      | 0.5                      | 0.4                      | 0.40 (0.26 - 0.62) |       | 0.31 (0.19 - 0.49) |       |  |
| Fatal bleeding                       | < 75 yr | 0.3                      | 0.2                      | 0.1                      | 0.66 (0.36 - 1.22) | 0.40  | 0.30 (0.14 - 0.67) | 0.66  |  |
|                                      | ≥ 75yr  | 0.6                      | 0.3                      | 0.2                      | 0.46 (0.25 - 0.84) |       | 0.38 (0.20 - 0.73) |       |  |
| Major GI bleeding                    | < 75 yr | 1.0                      | 1.1                      | 0.6                      | 1.15 (0.87 - 1.51) | 0.47  | 0.61 (0.44 - 0.85) | 0.48  |  |
|                                      | ≥ 75yr  | 1.7                      | 2.2                      | 1.2                      | 1.32 (1.01 - 1.72) |       | 0.72 (0.53 - 0.98) |       |  |
| Net clinical outcome:<br>--Primary   | < 75 yr | 6.2                      | 5.7                      | 5.6                      | 0.91 (0.82 - 1.02) | 0.55  | 0.90 (0.80 - 1.00) | 0.07  |  |
|                                      | ≥ 75yr  | 11.2                     | 9.7                      | 8.7                      | 0.87 (0.79 - 0.97) |       | 0.78 (0.7 - 0.87)  |       |  |
| Net clinical outcome:<br>--Secondary | < 75 yr | 4.0                      | 3.7                      | 3.7                      | 0.91 (0.80 - 1.04) | 0.49  | 0.90 (0.79 - 1.03) | 0.11  |  |
|                                      | ≥ 75yr  | 7.2                      | 6.1                      | 5.5                      | 0.86 (0.76 - 0.97) |       | 0.78 (0.68 - 0.88) |       |  |
| Net clinical outcome:<br>--Tertiary  | < 75 yr | 4.6                      | 4.2                      | 4.5                      | 0.91 (0.80 - 1.03) | 0.46  | 0.97 (0.86 - 1.10) | 0.05  |  |
|                                      | ≥ 75yr  | 8.2                      | 7.0                      | 6.7                      | 0.85 (0.76 - 0.96) |       | 0.82 (0.73 - 0.92) |       |  |

HDER; Higher dose edoxaban regimen, LDER; lower dose edoxaban

\*See Table 1 for abbreviations.

**Supplementary Figure S1. Age distribution**

The median age was 72 years (interquartile range, 64 to 78). 40.2% were aged  $\geq 75$  years including 899 (4.3%) in age group  $\geq 85$  years

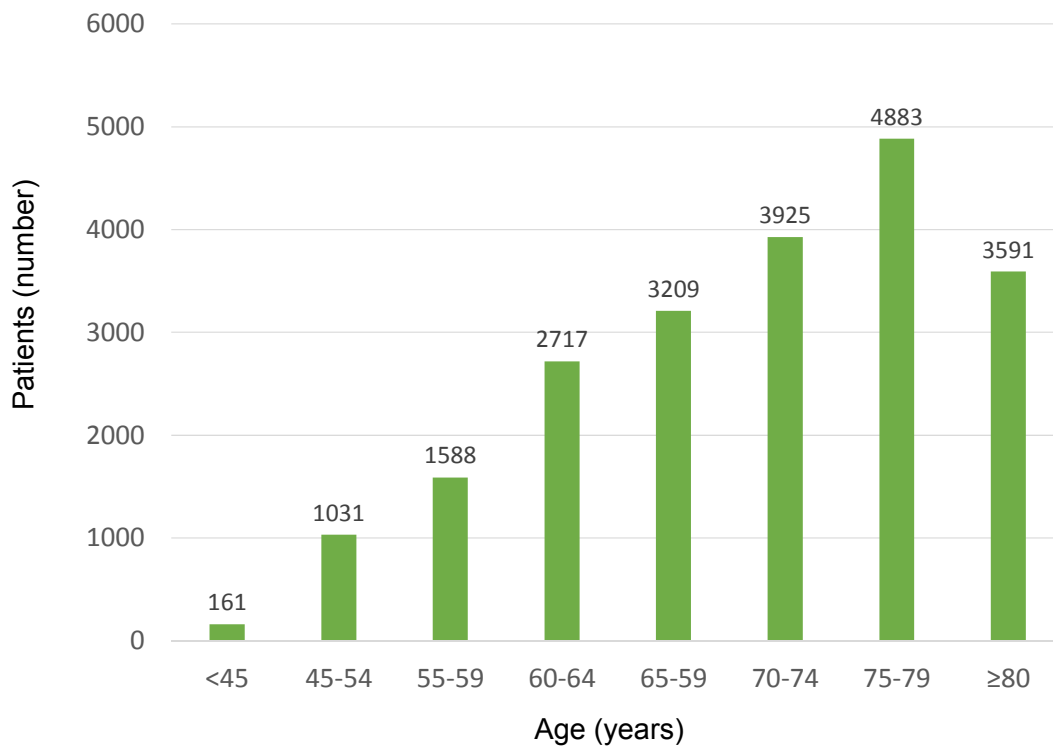

**Supplementary Figure S2. Efficacy and Safety Outcomes Comparing the Lower Dose Edoxaban Regimen vs. Warfarin by Age**

In the elderly, the risks of ISTH major bleeding (HR 0.47 [0.38-0.58]) and ICH (HR 0.30 [0.19-0.49]) were significantly reduced with the lower dose edoxaban regimen as compared to warfarin.

See Figure 1 and 3 for abbreviations.

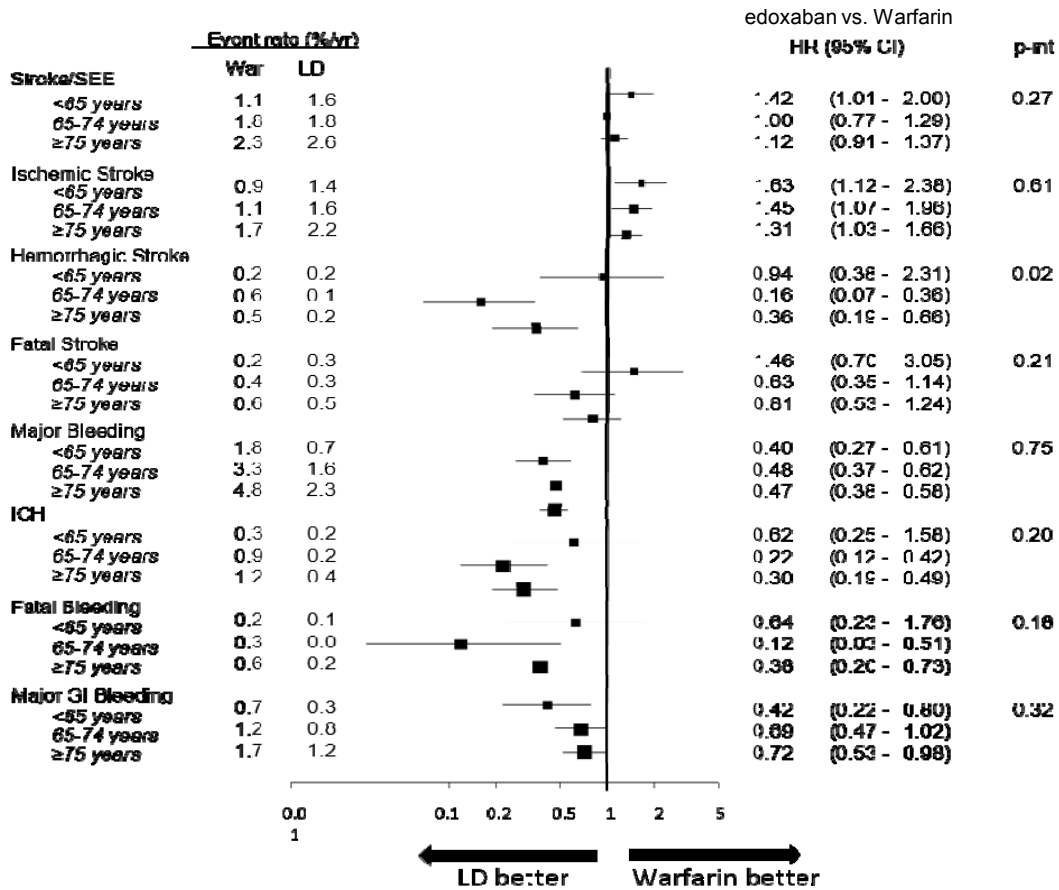

# Supplementary Figure 3.

## Net Clinical Outcomes of the Lower Dose Edoxaban Regimen Compared to Warfarin

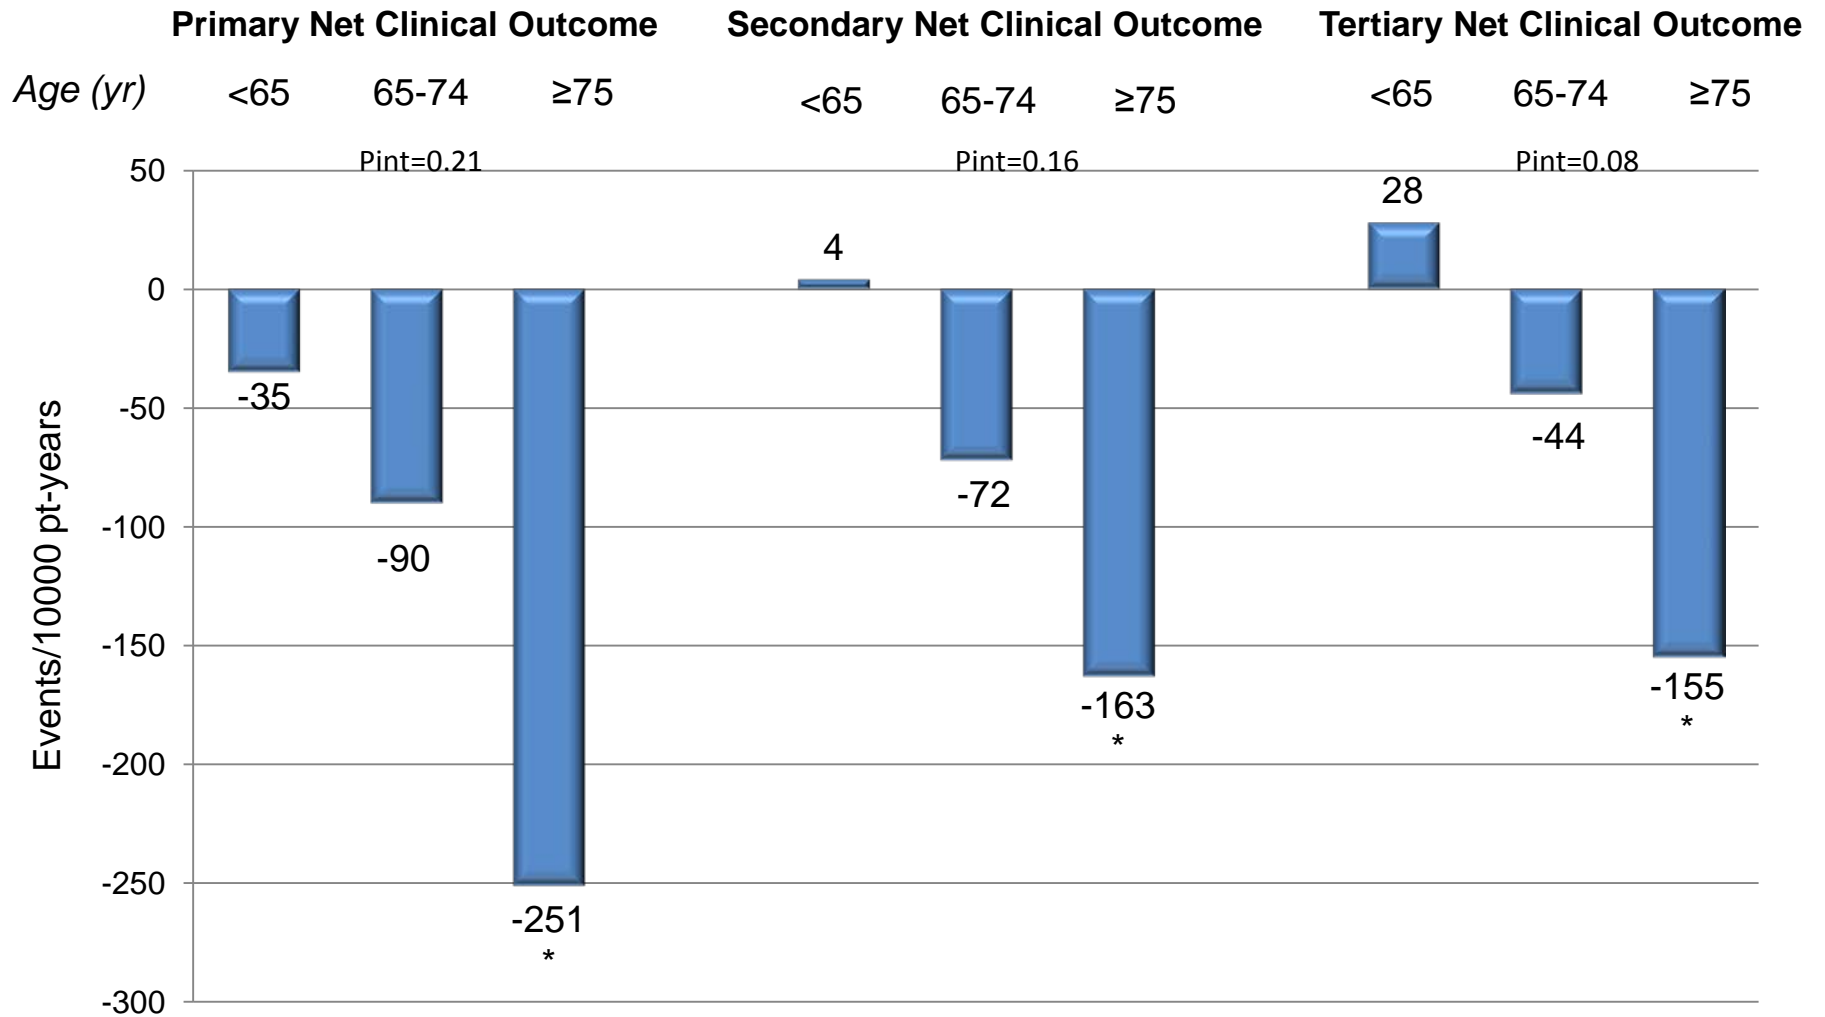

*Event rates (%/yr)*

| <i>Age (yr)</i> | <65 | 65-74 | ≥75  | <65 | 65-74 | ≥75 | <65 | 65-74 | ≥75 |
|-----------------|-----|-------|------|-----|-------|-----|-----|-------|-----|
| <i>Warfarin</i> | 4.9 | 7.3   | 11.2 | 3.0 | 4.8   | 7.2 | 3.6 | 5.5   | 8.2 |
| <i>LDER</i>     | 4.5 | 6.4   | 8.7  | 3.1 | 4.1   | 5.5 | 3.9 | 5.0   | 6.7 |
